# Supplementary material
Source: PubMed Central journal article supplement (PMC5215903)
Supplement: NIHMS839628-supplement-Supplmental_Information.pdf [file NIHMS839628-supplement-Supplmental_Information.pdf]

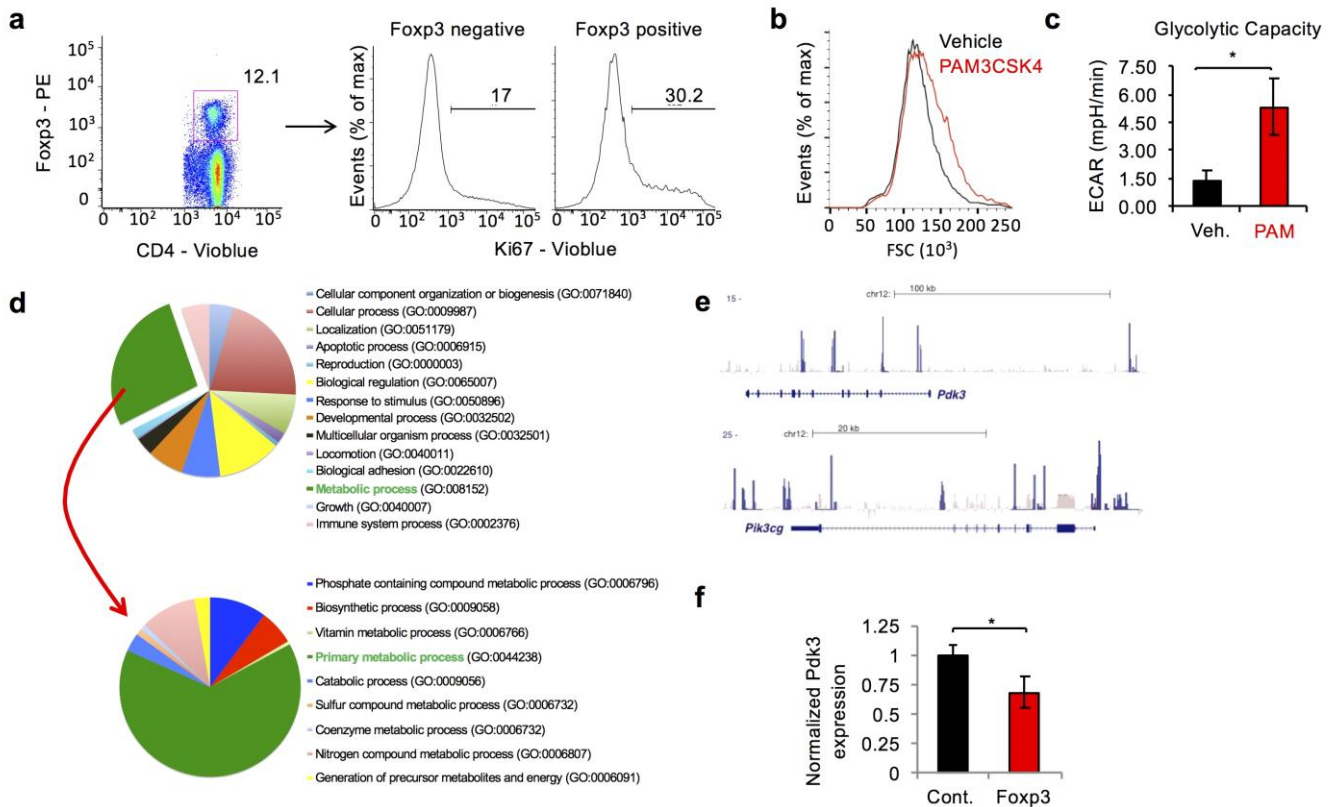

**Supplementary Figure 1**

**T<sub>reg</sub> cell metabolism is regulated by Foxp3 and inflammatory signals.**

**(a)** CD4<sup>+</sup>Foxp3<sup>+</sup> T cells and CD4<sup>+</sup>Foxp3<sup>-</sup> T cells were analyzed by flow cytometry for Ki67 expression levels. **(b-c)** CD4<sup>+</sup>CD25<sup>-</sup> T cells were isolated from the spleens of WT mice, polarized under T<sub>reg</sub> skewing conditions for 5 days and treated with vehicle (H<sub>2</sub>O) or 5 μg/mL Pam3CSK4 for the final 24 hrs. Cells were re-isolated by magnetic separation and analyzed for **(b)** forward scatter (FSC) and **(c)** glycolytic capacity using the Seahorse Extracellular Flux Analyzer. **(d)** Gene ontology analysis using PANTHER of pathways altered by Foxp3 deletion using gene expression data published by Williams and Rudensky (*Nat. Immunol* 8:277). **(e-f)** Primary murine CD4<sup>+</sup>CD25<sup>-</sup> T cells were activated and transduced with control or Foxp3 expressing retrovirus and **(e)** analyzed by chromatin immunoprecipitation-sequencing showing Foxp3 associated sites in the *pyruvate dehydrogenase kinase 3 (PDK3)* and *PIK3cg* loci or **(f)** analyzed by QPCR for expression of *PDK3* mRNA. Data are representative of biological triplicate experiments **(a-b, e-f)**, two independent experiments **(c)**, or an analysis of previously published datasets with biological duplicates **(d)**. Means and standard deviations are shown, \* p<0.05.

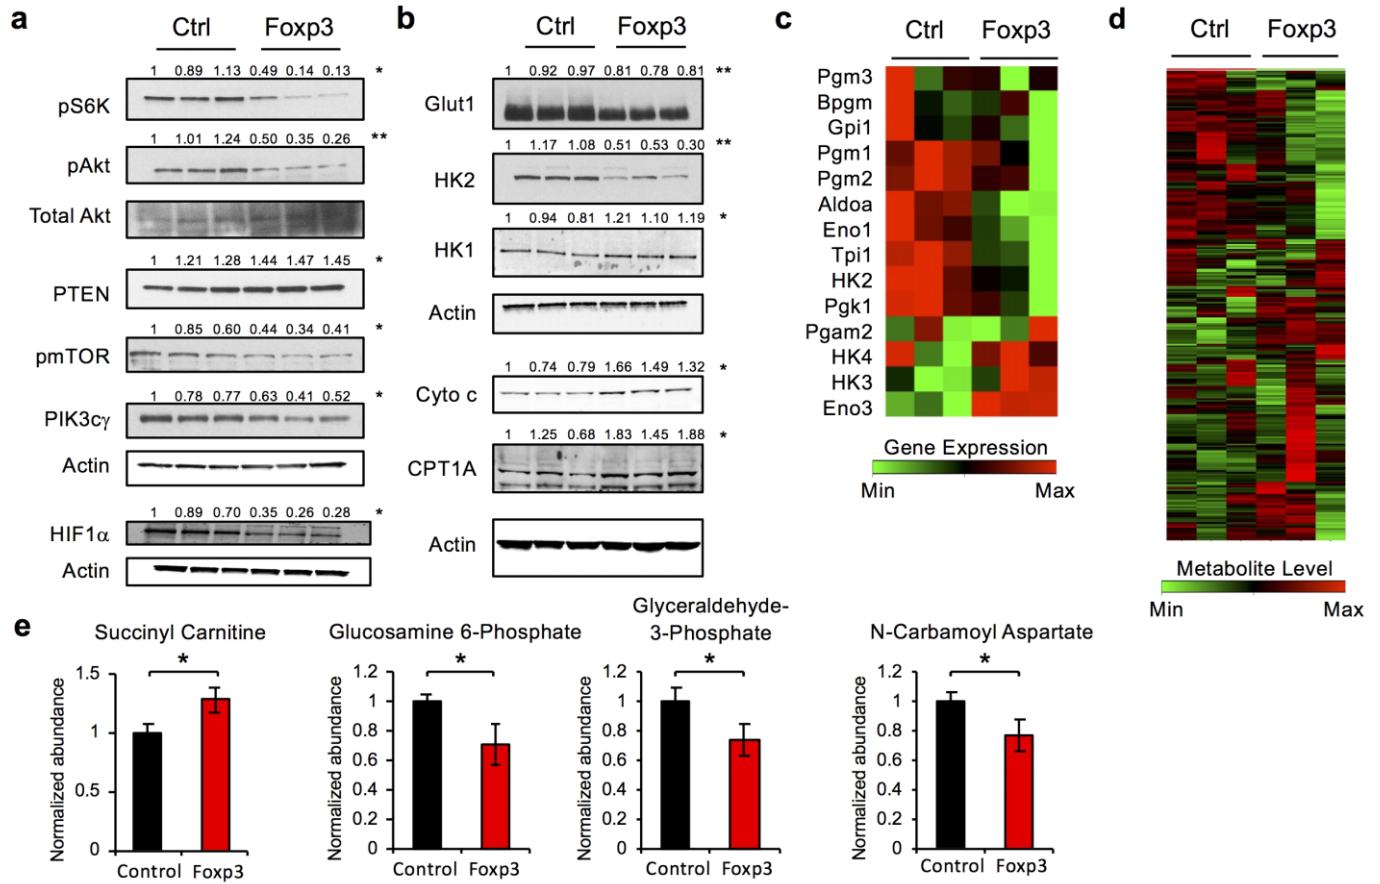

**Supplementary Figure 2**

**Foxp3 expression in non-T cell lineage inhibits anabolic growth signaling and gene expression.**

**a-e.** Three individual clones of control and Foxp3-ER expressing FL5.12 cells were treated with 4OHT to activate Foxp3 and examined for **(a-b)** the expression of metabolic and related proteins, **(c)** select glycolytic gene expression by QPCR or **(d-e)** were extracted and analyzed using high-resolution LC-QE-MS. **(d)** A heat map with relative levels of metabolites using unsupervised hierarchical clustering or **(e)** select metabolite levels are shown. Data are representative of three independent experiments **(a-b)** or an analysis of three independent clones **(c-e)**. **(a-b)** Gel bands are quantified, \*  $p < 0.05$ , \*\*  $p < 0.005$ .

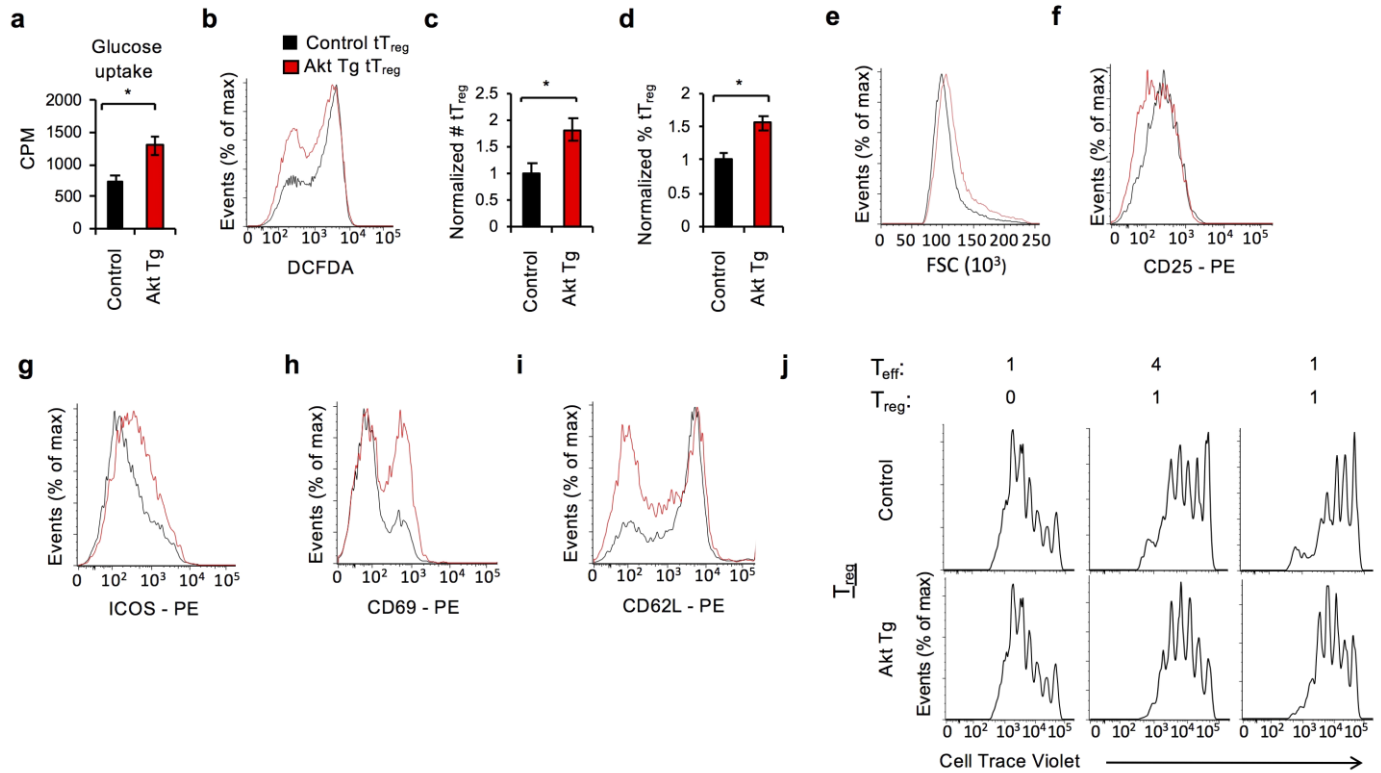

**Supplementary Figure 3**

**Constitutive Akt expression increases the number and frequency of T<sub>reg</sub> cells but diminishes suppressive function.**

**a-b.** CD4<sup>+</sup>CD25<sup>-</sup> T cells were isolated from the spleens of control and mAkt-Tg mice and polarized under T<sub>reg</sub> skewing conditions. Cells were examined for **(a)** glucose uptake and **(b)** ROS levels as measured by DCFDA. **c-i.** Foxp3<sup>+</sup> tTreg from the spleen of control and mAkt-Tg mice were examined for **(c)** tTreg number, **(d)** percentage and **(e)** cell size determined by forward scatter and were measured by flow cytometry. **(f)** CD25, **(g)** ICOS, **(h)** CD69 and **(i)** CD62L protein expression in CD4<sup>+</sup>Foxp3<sup>+</sup> control and mAkt-Tg cells were measured by flow cytometry. **(j)** CD4<sup>+</sup>CD25<sup>-</sup> T cells were isolated from the spleens of control and mAkt-Tg mice and were polarized under T<sub>reg</sub> skewing conditions to measure inhibition of effector T cell (T<sub>eff</sub>) proliferation in an *in vitro* suppression assay. Data are representative of two independent experiments **(a, b)**, three independent experiments **(c, d, f-i)**, four independent experiments **(e)**, or two experiments **(f, j)**. Means and standard deviations are shown, \* p<0.05.

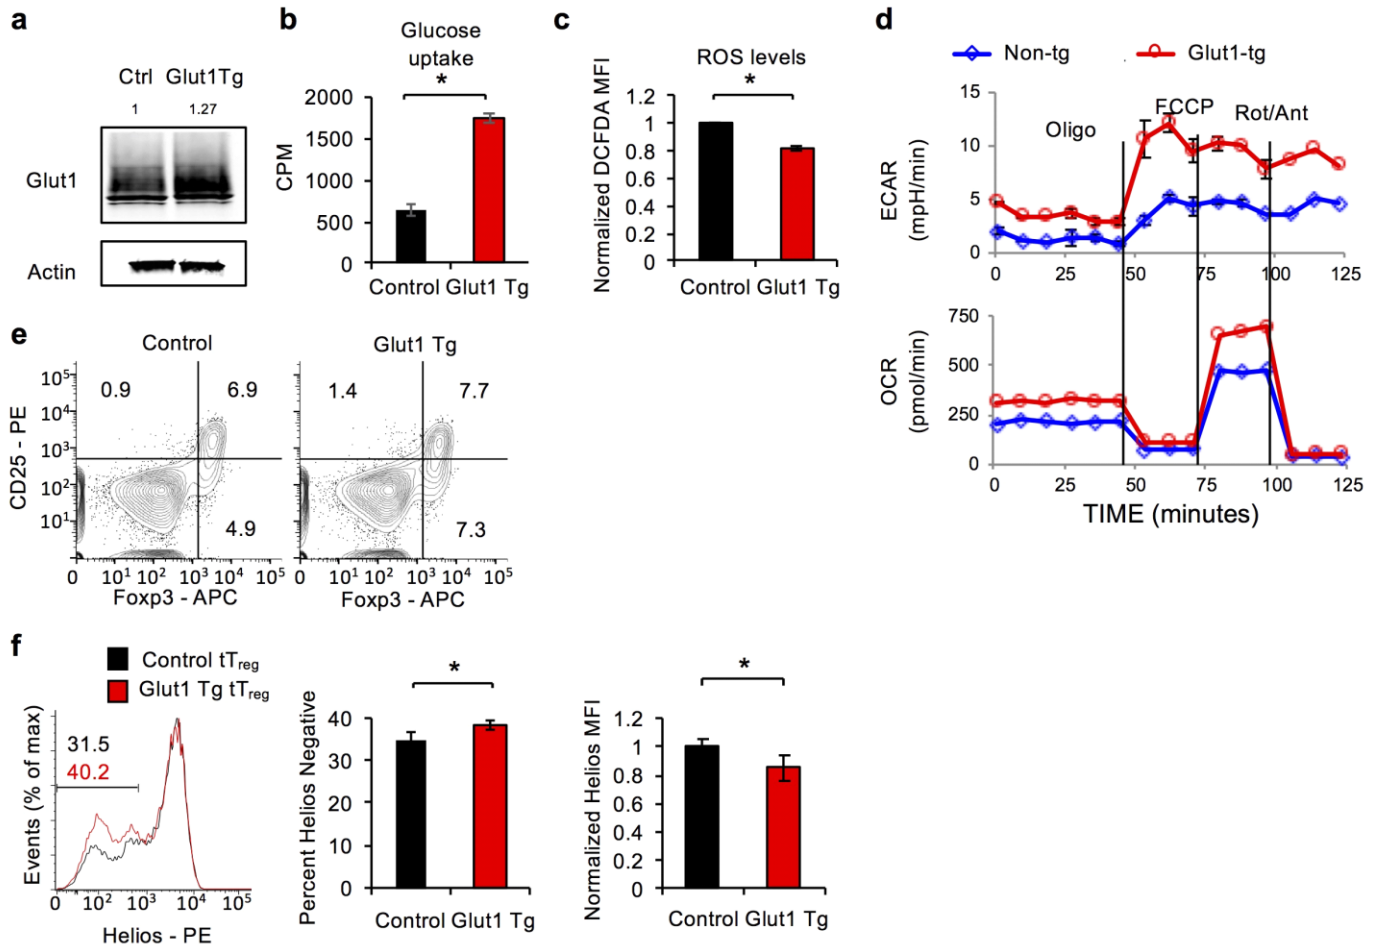

**Supplementary Figure 4**

**Transgenic expression of Glut1 results in altered metabolic and immune phenotypes in T<sub>reg</sub> cells.**

**a-d.** CD4<sup>+</sup>CD25<sup>+</sup> T cells were isolated from the spleens of control and Glut1-Tg mice and polarized under T<sub>reg</sub> skewing conditions. Cells were examined for **(a)** Glut1 expression levels by immunoblot, **(b)** glucose uptake, **(c)** ROS production as measured by DCFDA and **(d)** ECAR and OCR levels were measured using the Seahorse Extracellular Flux Analyzer before and after the addition of the specified inhibitors. **e-f.** CD4<sup>+</sup>Foxp3<sup>+</sup> T cells from the spleens of control and Glut1-Tg mice were examined for expression of **(e)** CD25 and **(f)** Helios proteins. Data are representative of three independent experiments (**a-b, d, e**) or compiled data from three independent experiments (**c, f**). Means and standard deviations are shown, \* p<0.05.

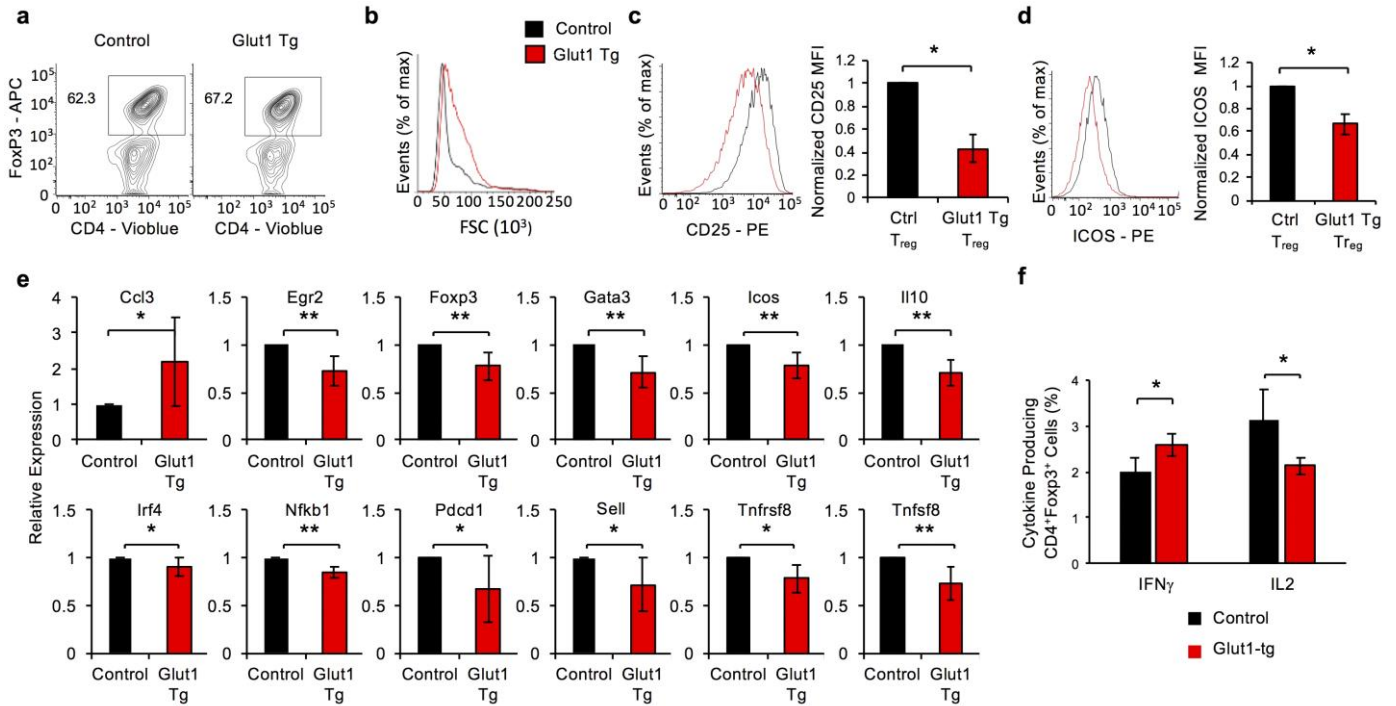

**Supplementary Figure 5**

**Transgenic Glut1 expression alters the immunological phenotype of T<sub>reg</sub> cells.**

**a-f.** CD4<sup>+</sup>CD25<sup>-</sup> T cells were isolated from the spleens of control and Glut1-Tg mice and polarized under T<sub>reg</sub> skewing conditions. Skewed cells were analyzed for **(a)** Foxp3 expression by flow cytometry, **(b)** cell size by FSC analysis, **(c)** CD25 and **(d)** ICOS protein expression by flow cytometry. **(e)** RNA expression levels of a panel of immunosuppressive related genes by QPCR and **(f)** percentage of IFN $\gamma$  and IL-2 producing CD4<sup>+</sup>Foxp3<sup>+</sup> cells by flow cytometry are shown. Data are representative of three independent experiments **(a-d)** or the average of six biological replicates **(e)** or four biological replicates **(f)**. Means and standard deviations are shown, \* p<0.05.

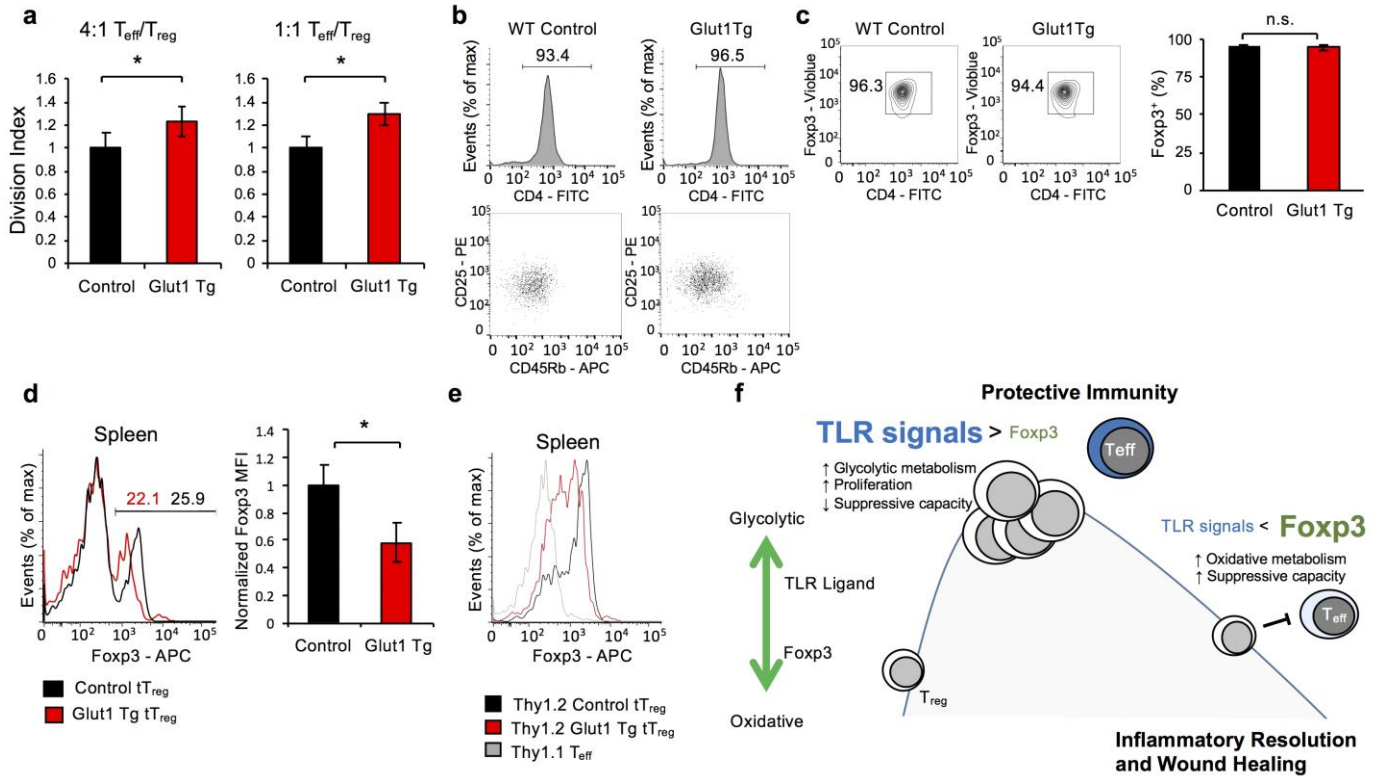

**Supplementary Figure 6**

**Transgenic expression of Glut1 diminishes the suppressive ability of  $T_{reg}$  cells *in vitro* and *in vivo*.**

**a.**  $CD4^+CD25^-$  T cells were isolated from the spleens of control and Glut1-Tg mice and polarized under  $T_{reg}$  skewing conditions. Control and Glut1-Tg  $T_{reg}$  were functionally examined in an *in vitro* suppression assay to measure inhibition of effector T cells ( $T_{eff}$ ) proliferation and the  $T_{eff}$  division index was calculated by Flowjo flow cytometry analysis software. **b-d.**  $RAG1^{-/-}$  mice were injected with naïve effector ( $CD4^+CD25^+CD45RB^{hi}$ ) T cells to induce colitis. After weight loss indicated active disease was apparent, control or Glut1-Tg  $CD4^+CD25^+CD45RB^{lo}$   $T_{reg}$  were sorted and analyzed by flow cytometry to assess sorted  $T_{reg}$ . **(b)** The expression of CD25 and CD45Rb and **(c)** Fopx3 protein of sorted rescue  $T_{reg}$  are shown. **(d)** At the termination of the experiment Fopx3 levels were assessed on  $CD4^+$  gated T cells in the spleens of recipient animals. **(e)** Thy1.1 naïve effector ( $CD4^+CD25^+CD45RB^{hi}$ ) T cells were adoptively transferred into  $RAG1^{-/-}$  mice to initiate IBD. Thy1.2 control or Glut1-tg  $tT_{reg}$  ( $CD4^+CD25^+CD45RB^{lo}$ ) T cells were sorted and injected after disease was apparent Fopx3 levels were then assessed by flow cytometry on adoptively transferred Thy1.1 effectors and Thy1.2  $CD4^+$  control and Glut1-tg  $T_{reg}$  from mesenteric lymph nodes and spleens. Data are the result of three independent experiments **(a)**, representative of three independent experiments **(b)** or is representative of two independent experiments with at least 5 mice per group **(c, d)**. Means and standard deviations are shown, \*  $p < 0.05$ . **(f)** Model of our findings. Our findings show that  $T_{reg}$  are metabolically heterogeneous and depend on activating and inflammatory signals as well as Fopx3 itself to coordinate metabolism. In the presence of inflammatory stimuli, such as TLR ligands,  $T_{reg}$  increase mTORC1 signaling, Glut1, and glycolysis, which results in increased cell growth and proliferation. Suppressive capacity, however, can be impaired. As inflammatory signals are reduced, Fopx3 can tilt the balance away from mTORC1 signaling to favor oxidative metabolism that lowers proliferative ability but enhances suppression to promote inflammatory resolution. Metabolic transitions are critical in this process as increased Glut1 expression is sufficient to promote  $T_{reg}$  growth while reducing suppression and stability.



**Supplementary Table 1. Genes in Primary Metabolic Process with altered expression upon Foxp3 deletion.** Microarray data from Foxp3 gene targeted T<sub>reg</sub> was analyzed using Geo Dataset browser of GDS2525 (p<0.1) and genes with 1.5-fold change from control were analyzed using PANTHER gene ontology analysis classification system (pantherdb.org). Genes in Primary Metabolic Processes (GO:0044238; as shown in Supplementary Fig. 1d) are indicated.

|          |                                                                                                                    |
|----------|--------------------------------------------------------------------------------------------------------------------|
| Slc25a44 | Solute carrier family 25 member 44;Slc25a44;ortholog                                                               |
| Pten     | Phosphatidylinositol 3,4,5-trisphosphate 3-phosphatase and dual-specificity protein phosphatase PTEN;Pten;ortholog |
| Gfpt1    | Glutamine--fructose-6-phosphate aminotransferase [isomerizing] 1;Gfpt1;ortholog                                    |
| Ucp2     | Mitochondrial uncoupling protein 2;Ucp2;ortholog                                                                   |
| Pfkfb1   | 6-phosphofructo-2-kinase/fructose-2,6-bisphosphatase 1;Pfkfb1;ortholog                                             |
| Slc35c1  | GDP-fucose transporter 1;Slc35c1;ortholog                                                                          |
| Eno2     | Gamma-enolase;Eno2;ortholog                                                                                        |
| Tkt      | Transketolase;Tkt;ortholog                                                                                         |
| Gapdh    | Glyceraldehyde-3-phosphate dehydrogenase;Gapdh;ortholog                                                            |
| Prps1    | Ribose-phosphate pyrophosphokinase 1;Prps1;ortholog                                                                |
| Atp5e    | ATP synthase subunit epsilon, mitochondrial;Atp5e;ortholog                                                         |
| Slc35e1  | Solute carrier family 35 member E1;Slc35e1;ortholog                                                                |
| Ahr      | Aryl hydrocarbon receptor;Ahr;ortholog                                                                             |
| Acox1    | Acyl-coenzyme A oxidase-like protein;Acox1;ortholog                                                                |
| Foxp3    | Forkhead box protein P3;Foxp3;ortholog                                                                             |
| Cpt1a    | Carnitine O-palmitoyltransferase 1, liver isoform;Cpt1a;ortholog                                                   |
| Slc25a29 | Mitochondrial carnitine/acylcarnitine carrier protein CACL;Slc25a29;ortholog                                       |
| Faah     | Fatty-acid amide hydrolase 1;Faah;ortholog                                                                         |
| Rraga    | Ras-related GTP-binding protein A;Rraga;ortholog                                                                   |
| Acat2    | Acetyl-CoA acetyltransferase, cytosolic;Acat2;ortholog                                                             |
| Pfkfb3   | 6-phosphofructokinase type C;Pfkfb3;ortholog                                                                       |
| Acss1    | Acetyl-coenzyme A synthetase 2-like, mitochondrial;Acss1;ortholog                                                  |
| Txnrd2   | Thioredoxin reductase 2, mitochondrial;Txnrd2;ortholog                                                             |
| Mgll     | Monoglyceride lipase;Mgll;ortholog                                                                                 |
| Acss2    | Acetyl-coenzyme A synthetase, cytoplasmic;Acss2;ortholog                                                           |
| Ogdh     | 2-oxoglutarate dehydrogenase, mitochondrial;Ogdh;ortholog                                                          |
| Slc7a5   | Large neutral amino acids transporter small subunit 1;Slc7a5;ortholog                                              |
| Gpd2     | Glycerol-3-phosphate dehydrogenase, mitochondrial;Gpd2;ortholog                                                    |
| Slc27a4  | Long-chain fatty acid transport protein 4;Slc27a4;ortholog                                                         |
| Pik3c2a  | Phosphatidylinositol 4-phosphate 3-kinase C2 domain-containing subunit alpha;Pik3c2a;ortholog                      |
| Slc25a36 | Solute carrier family 25 member 36;Slc25a36;ortholog                                                               |
| Elovl1   | Elongation of very long chain fatty acids protein 1;Elovl1;ortholog                                                |

|          |                                                                                               |
|----------|-----------------------------------------------------------------------------------------------|
| Pfkl     | 6-phosphofructokinase, liver type;Pfkl;ortholog                                               |
| Txnrd1   | Thioredoxin reductase 1, cytoplasmic;Txnrd1;ortholog                                          |
| Ggt1     | Gamma-glutamyltranspeptidase 1;Ggt1;ortholog                                                  |
| Xdh      | Xanthine dehydrogenase/oxidase;Xdh;ortholog                                                   |
| Slc45a4  | Solute carrier family 45 member 4;Slc45a4;ortholog                                            |
| Pprc1    | Peroxisome proliferator-activated receptor gamma coactivator-related protein 1;Pprc1;ortholog |
| Alox8    | Arachidonate 8S-lipoxygenase;Alox8;ortholog                                                   |
| Gsk3b    | Glycogen synthase kinase-3 beta;Gsk3b;ortholog                                                |
| Slc25a30 | Kidney mitochondrial carrier protein 1;Slc25a30;ortholog                                      |
| Odc1     | Ornithine decarboxylase;Odc1;ortholog                                                         |
| Tpi1     | Triosephosphate isomerase;Tpi1;ortholog                                                       |
| Gclc     | Glutamate--cysteine ligase catalytic subunit;Gclc;ortholog                                    |



**Supplementary Table 2. Overlapping genes with Foxp3 deletion or overexpression.** Microarray data from Foxp3 gene targeted T<sub>reg</sub> was analyzed using Geo Dataset browser of GDS2525 (p<0.1) and genes with 1.5-fold change from control were compared to genes altered by retroviral Foxp3 overexpression (ArrayExpress E-MTAB-4561; p<0.05). Overlapping genes that increased or decreased with modulation of Foxp3 expression are shown.

| <b>Genes Lower with FoxP3 Deletion and Increased with FoxP3 Expression</b> | <b>Genes Increased with FoxP3 Deletion and Decreased with FoxP3 Expression</b> |
|----------------------------------------------------------------------------|--------------------------------------------------------------------------------|
| Arl5a                                                                      | 2610018G03Rik                                                                  |
| Arrdc4                                                                     | Acpp                                                                           |
| Atp6v0d2                                                                   | Ar                                                                             |
| Ccrl2                                                                      | Arhgap26                                                                       |
| Ccs                                                                        | Auh                                                                            |
| Cd72                                                                       | B4galnt1                                                                       |
| Cd81                                                                       | Bcl2                                                                           |
| Crem                                                                       | Bdh1                                                                           |
| Crim1                                                                      | Bhlhe40                                                                        |
| Ctla4                                                                      | Btg2                                                                           |
| Cxcl2                                                                      | Cd160                                                                          |
| Cyfp1                                                                      | Cd96                                                                           |
| Dusp4                                                                      | Cdyl2                                                                          |
| Ebi3                                                                       | Dap                                                                            |
| Entpd1                                                                     | Dusp6                                                                          |
| Epcam                                                                      | Ehd3                                                                           |
| Foxp3                                                                      | Gab3                                                                           |
| Gem                                                                        | Ggt1                                                                           |
| Glrx                                                                       | Golm1                                                                          |
| Gpr83                                                                      | Gpr171                                                                         |
| Hgfac                                                                      | Gramd1a                                                                        |
| Hspbap1                                                                    | Grap2                                                                          |
| Icos                                                                       | Higd2a                                                                         |
| Ighm                                                                       | Il1rl2                                                                         |
| Ikzf2                                                                      | Kcnk5                                                                          |
| Il10                                                                       | Klrb1f                                                                         |
| Il1r2                                                                      | Ldlr                                                                           |
| Il1rl1                                                                     | Lgals3                                                                         |
| Itgae                                                                      | Lgals3bp                                                                       |
| Itgav                                                                      | Lmo4                                                                           |
| Itgb8                                                                      | Mfsd6                                                                          |
| Klrg1                                                                      | Mgll                                                                           |
| Mab21l1                                                                    | Ms4a6d                                                                         |
| Micall1                                                                    | Nebi                                                                           |

|          |         |
|----------|---------|
| Naip5    | Nqo2    |
| Neb      | Pde3b   |
| Nrn1     | Pde7a   |
| Nucb2    | Phf6    |
| Odc1     | Pim2    |
| Pde2a    | Pltp    |
| Pdzk1ip1 | Rab4b   |
| Phlpp1   | Rnf19a  |
| Plxnc1   | Runx2   |
| Plxnd1   | Satb1   |
| Prdm1    | Sco1    |
| Prdx4    | Sema4a  |
| Ptprj    | Slco3a1 |
| Rab6b    | Snai3   |
| Rrad     | Sorl1   |
| Rxra     | Ssrp1   |
| Samsn1   | Stat4   |
| Slc14a1  | Stk39   |
| Slc45a4  | Tab2    |
| Snx9     | Tcf7    |
| Tcn2     | Themis  |
| Tjp3     | Tnfsf8  |
| Tlr1     | Tomm22  |
| Tns1     | Topors  |
| Tspan17  | Trim36  |
| Tspan32  | Xdh     |
| Vamp5    |         |
| Vav2     |         |
| Zbtb10   |         |
| Zfp612   |         |

**Supplementary Table 3. Gene ontology analysis of pathways altered based on shared gene expression changes with modulation of Foxp3 expression.** Genes identified in Supplementary Table 2 as overlapping between Foxp3 gene deletion or overexpression were analyzed by DAVID Gene Functional Classification Tool and sorted by fold-enrichment for the pathway.

| Pathway                                                        | Fold-Enrichment | Genes                            |
|----------------------------------------------------------------|-----------------|----------------------------------|
| GO:0006687~glycosphingolipid metabolic process                 | 23.32036613     | ITGB8, CREM, B4GALNT1            |
| GO:0046632~alpha-beta T cell differentiation                   | 23.32036613     | SATB1, BCL2, FOXP3               |
| GO:0006664~glycolipid metabolic process 3                      | 20.14031621     | ITGB8, CREM, B4GALNT1            |
| GO:0046631~alpha-beta T cell activation                        | 19.26465028     | SATB1, BCL2, FOXP3               |
| GO:0007160~cell-matrix adhesion                                | 8.86173913      | ITGB8, BCL2, RAB4B               |
| GO:0050864~regulation of B cell activation                     | 8.056126482     | CD81, FOXP3, IL10                |
| GO:0030217~T cell differentiation                              | 7.773455378     | SATB1, THEMIS, BCL2, FOXP3       |
| GO:0031589~cell-substrate adhesion                             | 7.773455378     | ITGB8, BCL2, RAB4B               |
| GO:0006665~sphingolipid metabolic process                      | 7.146563815     | ITGB8, CREM, B4GALNT1            |
| GO:0045454~cell redox homeostasis                              | 7.146563815     | PRDX4, SCO1, GLRX                |
| GO:0006643~membrane lipid metabolic process                    | 6.923233696     | ITGB8, CREM, B4GALNT1            |
| GO:0007229~integrin-mediated signaling pathway                 | 5.830091533     | ITGB8, ITGAE, ITGAV              |
| GO:0031401~positive regulation of protein modification process | 5.680602007     | BCL2, CD81, FOXP3                |
| GO:0002521~leukocyte differentiation                           | 5.200551133     | SATB1, THEMIS, GAB3, BCL2, FOXP3 |
| GO:0030098~lymphocyte differentiation                          | 5.182303585     | SATB1, THEMIS, BCL2, FOXP3       |
| GO:0006470~protein amino acid dephosphorylation                | 5.182303585     | PTPRJ, DUSP4, BCL2, DUSP6        |
| GO:0042110~T cell activation                                   | 5.092953523     | SATB1, THEMIS, BCL2, FOXP3       |
| GO:0001763~morphogenesis of a branching structure              | 4.72626087      | AR, BCL2, PLXND1, IL10           |
| GO:0010876~lipid localization                                  | 4.61548913      | LDLR, SORL1, PLTP, B4GALNT1      |
| GO:0016311~dephosphorylation                                   | 4.189947579     | PTPRJ, DUSP4, BCL2, DUSP6        |

|                                                                      |             |                                                                        |
|----------------------------------------------------------------------|-------------|------------------------------------------------------------------------|
| GO:0001655~urogenital system development                             | 4.046456224 | ODC1, AR, RXRA, BCL2                                                   |
| GO:0048732~gland development                                         | 3.748620614 | XDH, AR, RXRA, BCL2, PLXND1                                            |
| GO:0032535~regulation of cellular component size                     | 3.669457197 | NEB, BCL2, CD81, CYFIP1                                                |
| GO:0001775~cell activation                                           | 3.60233298  | SATB1, THEMIS, BCL2, TLR1, ENTPD1, FOXP3                               |
| GO:0007264~small GTPase mediated signal transduction                 | 3.434782609 | ARL5A, RAB4B, RRAD, RAB6B, GEM, VAV2                                   |
| GO:0045321~leukocyte activation                                      | 3.372046853 | SATB1, THEMIS, BCL2, TLR1, FOXP3                                       |
| GO:0006955~immune response                                           | 3.135788794 | MFSD6, IL1RL1, THEMIS, IL1RL2, CXCL2, TLR1, CTLA4, FOXP3, IL10, TNFSF8 |
| GO:0008284~positive regulation of cell proliferation                 | 3.12033068  | ODC1, BCL2, CD81, MAB21L1, FOXP3, RUNX2                                |
| GO:0048729~tissue morphogenesis                                      | 3.102849836 | AR, LMO4, RXRA, BCL2, PLXND1                                           |
| GO:0030097~hemopoiesis                                               | 2.942144466 | SATB1, THEMIS, GAB3, BCL2, FOXP3                                       |
| GO:0043085~positive regulation of catalytic activity                 | 2.829418624 | BCL2, CD81, TLR1, CCS, VAV2                                            |
| GO:0042127~regulation of cell proliferation                          | 2.745272345 | ODC1, TCF7, AR, BCL2, CD81, TOPORS, MAB21L1, FOXP3, RUNX2, IL10        |
| GO:0010604~positive regulation of macromolecule metabolic process    | 2.566591112 | AR, IKZF2, RXRA, BCL2, CD81, TLR1, TOPORS, PRDM1, FOXP3, RUNX2, IL10   |
| GO:0042592~homeostatic process                                       | 2.276131626 | XDH, LDLR, BCL2, NUCB2, PRDX4, PDE3B, FOXP3, SCO1, GLRX                |
| GO:0010557~positive regulation of macromolecule biosynthetic process | 2.229368335 | AR, IKZF2, RXRA, TLR1, TOPORS, FOXP3, RUNX2, IL10                      |
| GO:0006915~apoptosis                                                 | 2.223375409 | PHLPP1, 2610018G03RIK, BCL2, NAIP5, DAP, TOPORS, PIM2                  |
| GO:0012501~programmed cell death                                     | 2.185770751 | PHLPP1, 2610018G03RIK, BCL2, NAIP5, DAP, TOPORS, PIM2                  |
| GO:0009891~positive regulation of biosynthetic process               | 2.121302006 | AR, IKZF2, RXRA, TLR1, TOPORS, FOXP3, RUNX2, IL10                      |

**Supplementary Table 4. Glucose metabolism QPCR Array Ct values for Foxp3 expressing cells.** Control and Foxp3-ER expressing FL5.12 cells were treated with 4-OHT and metabolic gene expression was determined by QPCR array. Ct values for each cell line are provided.

| Gene Symbol | Control line 1 | Control line 2 | Control line 3 | FoxP3 line 1 | FoxP3 line 2 | FoxP3 line 3 |
|-------------|----------------|----------------|----------------|--------------|--------------|--------------|
| Acly        | 24.16          | 25.54          | 23.55          | 24.43        | 24.28        | 23.54        |
| Aco1        | 35             | 35             | 35             | 35           | 35           | 35           |
| Aco2        | 27.25          | 28.08          | 26.25          | 26.99        | 27.06        | 25.83        |
| Agl         | 26.69          | 27.45          | 25.47          | 25.47        | 25.69        | 24.95        |
| Aldoa       | 21.05          | 22.1           | 19.83          | 20.65        | 21.04        | 20.01        |
| Aldob       | 35             | 35             | 35             | 35           | 35           | 35           |
| Aldoc       | 35             | 34.16          | 33.46          | 33.89        | 33.04        | 32.53        |
| Bpgm        | 29.18          | 30.16          | 27.69          | 28.32        | 28.17        | 27.47        |
| Cs          | 29.66          | 30.56          | 27.92          | 28.31        | 28.38        | 27.64        |
| Dlat        | 26.84          | 27.51          | 25.32          | 26           | 26.06        | 25.23        |
| Dld         | 24.53          | 25.48          | 23.39          | 24.03        | 23.98        | 23.12        |
| Dlst        | 25.02          | 25.67          | 23.59          | 23.85        | 24.08        | 23.63        |
| Eno1        | 21.3           | 22.26          | 19.97          | 20.92        | 21.22        | 20.44        |
| Eno2        | 35             | 35             | 35             | 35           | 35           | 35           |
| Eno3        | 27.23          | 28.4           | 25.68          | 26.04        | 25.36        | 24.27        |
| Fbp1        | 35             | 35             | 35             | 35           | 35           | 35           |
| Fbp2        | 35             | 35             | 35             | 35           | 35           | 35           |
| Fh1         | 24.53          | 25.48          | 23.92          | 24.38        | 24.42        | 23.76        |
| G6pc        | 35             | 35             | 35             | 35           | 35           | 35           |
| G6pc3       | 26.19          | 27.09          | 25.22          | 25.18        | 25.14        | 24.19        |
| G6pdx       | 25.4           | 26.43          | 23.89          | 24.13        | 24.08        | 23.23        |
| Galm        | 35             | 35             | 35             | 35           | 35           | 35           |
| Gapdhs      | 35             | 35             | 35             | 35           | 35           | 35           |
| Gbe1        | 29.1           | 30.24          | 28.13          | 28.44        | 28.6         | 28.23        |
| Gck         | 35             | 31.9           | 31.17          | 34.62        | 31.42        | 28.62        |
| Gpi1        | 23.38          | 24.38          | 22.08          | 22.53        | 22.64        | 21.72        |
| Gsk3a       | 26             | 27.02          | 24.26          | 25.08        | 24.88        | 23.93        |
| Gsk3b       | 26.53          | 27.59          | 25.52          | 25.89        | 25.66        | 24.92        |
| Gys1        | 26.9           | 28.04          | 25.69          | 26.02        | 26.22        | 25.36        |
| Gys2        | 35             | 35             | 35             | 35           | 35           | 35           |
| H6pd        | 28.45          | 29.11          | 26.61          | 27.15        | 27.28        | 26.14        |
| Hk2         | 26.52          | 27.31          | 25.21          | 26.06        | 26.12        | 25.81        |
| Hk3         | 31.48          | 32.01          | 28.88          | 29.33        | 29.08        | 28.25        |
| ldh1        | 26.9           | 27.92          | 25.66          | 26.1         | 26.02        | 25.44        |

|         |       |       |       |       |       |       |
|---------|-------|-------|-------|-------|-------|-------|
| Idh2    | 25.1  | 26.09 | 24.04 | 24.39 | 24.31 | 23.72 |
| Idh3a   | 24.44 | 25.26 | 22.77 | 23.59 | 23.52 | 22.56 |
| Idh3b   | 24.87 | 25.5  | 23.25 | 23.97 | 24.09 | 23.27 |
| Idh3g   | 23.85 | 24.8  | 22.7  | 23.18 | 23.22 | 22.4  |
| Mdh1    | 25.54 | 26.22 | 24.49 | 25.16 | 25.21 | 24.12 |
| Mdh1b   | 35    | 35    | 35    | 35    | 35    | 35    |
| Mdh2    | 23.59 | 24.1  | 22.55 | 23    | 23.12 | 22.33 |
| Ogdh    | 25.28 | 26.34 | 23.88 | 24.64 | 24.62 | 23.44 |
| Pck1    | 35    | 35    | 35    | 35    | 35    | 35    |
| Pck2    | 26.11 | 27.04 | 24.75 | 25.24 | 25.65 | 24.82 |
| Pcx     | 28.19 | 28.86 | 26.27 | 26.67 | 27.29 | 26    |
| Pdha1   | 25.54 | 26.33 | 24.01 | 24.52 | 24.62 | 23.85 |
| Pdhb    | 25.57 | 26.68 | 24.59 | 25.07 | 25.01 | 24.25 |
| Pdk1    | 27.21 | 28.04 | 25.76 | 26.92 | 26.81 | 26.64 |
| Pdk2    | 35    | 35    | 35    | 35    | 35    | 35    |
| Pdk3    | 25.11 | 25.81 | 24.26 | 24.81 | 25.05 | 23.95 |
| Pdk4    | 35    | 35    | 35    | 35    | 35    | 35    |
| Pdp2    | 28.08 | 28.63 | 26.7  | 27.11 | 27.49 | 26.65 |
| Pdpr    | 29.29 | 29.94 | 27.6  | 28.08 | 28.28 | 26.98 |
| Pfkl    | 24.38 | 25.41 | 22.81 | 23.75 | 24.08 | 23.25 |
| Pgam2   | 31.13 | 32.1  | 30.05 | 29.95 | 29.94 | 28.81 |
| Pgk1    | 22.41 | 23.25 | 21.17 | 21.82 | 22.11 | 21.66 |
| Pgk2    | 35    | 35    | 35    | 35    | 35    | 35    |
| Pgm1    | 25.58 | 26.58 | 24.61 | 24.92 | 25.02 | 24.15 |
| Pgm2    | 26.08 | 27.05 | 25.07 | 25.52 | 25.45 | 25.08 |
| Pgm3    | 28.45 | 29.61 | 27.28 | 27.72 | 27.85 | 26.54 |
| Phka1   | 35    | 35    | 35    | 35    | 35    | 35    |
| Phkb    | 27.26 | 28.46 | 26.05 | 26.38 | 26.17 | 25.26 |
| Phkg1   | 34.73 | 35    | 33.48 | 34.3  | 34.18 | 32.66 |
| Phkg2   | 27.66 | 28.71 | 26.44 | 26.83 | 26.88 | 25.51 |
| Pklr    | 35    | 35    | 35    | 35    | 35    | 35    |
| Prps1   | 24.71 | 25.81 | 23.58 | 23.86 | 23.73 | 23.05 |
| Prps1l1 | 35    | 35    | 35    | 35    | 35    | 35    |
| Prps2   | 26.28 | 27.23 | 25.02 | 25.27 | 25.23 | 24.57 |
| Pygl    | 35    | 35    | 35    | 33.65 | 35    | 35    |
| Pygm    | 34.02 | 35    | 33.68 | 33.78 | 34.12 | 33.63 |
| Rbks    | 28    | 29    | 27.44 | 27.66 | 27.9  | 26.94 |
| Rpe     | 26.07 | 26.56 | 24.7  | 25.23 | 25.37 | 24.29 |
| Rpia    | 24.54 | 25.49 | 23.64 | 24.31 | 24.17 | 23.54 |
| Sdha    | 24.33 | 25.35 | 23.13 | 23.65 | 23.64 | 22.9  |
| Sdhb    | 25.36 | 26.38 | 24.5  | 25.25 | 25.15 | 24.37 |

|          |       |       |       |       |       |       |
|----------|-------|-------|-------|-------|-------|-------|
| Sdhc     | 24.19 | 25.39 | 23.26 | 23.82 | 23.67 | 22.9  |
| Sdhd     | 28.41 | 29.62 | 27.49 | 27.86 | 27.85 | 27.17 |
| Sucla2   | 26.05 | 27.02 | 25.01 | 25.53 | 25.63 | 24.71 |
| Suclg1   | 28.42 | 29.63 | 26.53 | 27.26 | 27.09 | 26.77 |
| Suclg2   | 25.36 | 26.35 | 24.22 | 24.9  | 24.83 | 24.21 |
| Taldo1   | 25.74 | 26.71 | 24.73 | 27.4  | 25.07 | 24.31 |
| Tkt      | 22.23 | 23.37 | 21.16 | 21.56 | 21.5  | 20.69 |
| Tpi1     | 22.8  | 23.69 | 21.64 | 22.47 | 22.53 | 22.04 |
| Ugp2     | 26.77 | 27.76 | 25.46 | 25.85 | 25.94 | 24.67 |
| Actb     | 19.7  | 20.95 | 18.45 | 18.68 | 18.58 | 17.31 |
| B2m      | 23.53 | 24.64 | 22.97 | 23.1  | 23.02 | 21.41 |
| Gapdh    | 21.21 | 22.61 | 19.85 | 20.62 | 20.94 | 19.65 |
| Gusb     | 26.02 | 26.83 | 25.07 | 25.33 | 25.27 | 24.35 |
| Hsp90ab1 | 21.16 | 22.13 | 19.81 | 20.28 | 20.39 | 19.57 |











**Supplementary Table 6. Gene ontology analysis of pathways altered based on shared gene expression changes between age-matched Glut1 and control T<sub>reg</sub> cohorts.** Genes identified in RNAseq (Geo accession GSE84919) as  $p < 0.05$ ,  $\log_2$  0.3-fold different between normalized cohorts of control and Glut1-tg T<sub>reg</sub> were analyzed by DAVID Gene Functional Classification Tool. Pathways were sorted by fold-enrichment as increased (positive Fold-Enrichment) or decreased (negative Fold-Enrichment) in Glut1-tg T<sub>reg</sub>.

| Pathway                                                             | Fold-Enrichment | Genes                                                                                                                                                                                                                                             |
|---------------------------------------------------------------------|-----------------|---------------------------------------------------------------------------------------------------------------------------------------------------------------------------------------------------------------------------------------------------|
| GO:0033138~positive regulation of peptidyl-serine phosphorylation   | 18.97765        | OSM, LIF, IFNG                                                                                                                                                                                                                                    |
| GO:0002763~positive regulation of myeloid leukocyte differentiation | 8.758917        | LIF, TNFSF11, ID2                                                                                                                                                                                                                                 |
| GO:0007259~JAK-STAT cascade                                         | 5.422187        | OSM, LIF, IFNG, SOCS1                                                                                                                                                                                                                             |
| GO:0008213~protein amino acid alkylation                            | 4.413408        | PRMT1, PRMT7, GSPT1, PRMT5, EZH2                                                                                                                                                                                                                  |
| GO:0006730~one-carbon metabolic process                             | 3.892852        | MTHFD1, MTHFD2, PRMT1, SHMT2, AHCY, PRMT7, GSPT1, GM9826, PRMT5, EZH2, DNMT1, FPGS                                                                                                                                                                |
| GO:0016570~histone modification                                     | 3.300462        | KAT2A, HDAC2, PRMT7, EZH2, RUVBL2, MBD3, RUVBL1, RBM14                                                                                                                                                                                            |
| GO:0043414~biopolymer methylation                                   | 3.207491        | PRMT1, PRMT7, GSPT1, PRMT5, EZH2, DNMT1                                                                                                                                                                                                           |
| GO:0016569~covalent chromatin modification                          | 3.162942        | KAT2A, HDAC2, PRMT7, EZH2, RUVBL2, MBD3, RUVBL1, RBM14                                                                                                                                                                                            |
| GO:0006325~chromatin organization                                   | 2.77134         | HIST1H2AG, EZH2, CBX5, SET, PRMT7, PRMT5, HIST1H2BJ, HIST1H4F, H2AFX, HIST1H4C, HIST1H4D, HIST1H4I, ASF1B, ASF1A, HIST1H4H, KAT2A, HIST1H2BB, HIST1H1E, MBD3, HDAC2, NPTXR, HIST1H3A, HIST1H2AI, DNMT1, HIST1H3C, RUVBL2, HIST1H3E, RUVBL1, RBM14 |
| GO:0051276~chromosome organization                                  | 2.724515        | RAD51C, HIST1H2AG, EZH2, CBX5, NCAPH, SET, PRMT7, PRMT5, HIST1H2BJ, HIST1H4F, HIST1H4C, H2AFX, HIST1H4D, HIST1H4I, ASF1B, TOP2A, ASF1A,                                                                                                           |

|                                                                 |          |                                                                                                                                                                                              |
|-----------------------------------------------------------------|----------|----------------------------------------------------------------------------------------------------------------------------------------------------------------------------------------------|
|                                                                 |          | BUB3, HIST1H4H, KAT2A, HIST1H2BB, HIST1H1E, MBD3, RAD54L, MIS12, HDAC2, NPTXR, HIST1H3A, HIST1H2AI, HIST1H3C, DNMT1, RUVBL2, RUVBL1, HIST1H3E, RBM14                                         |
| GO:0033554~cellular response to stress                          | 2.442668 | KIF22, APEX2, MRE11A, ROMO1, HMOX1, IFNG, H2AFX, POLQ, ASF1A, EIF2B5, RAD51AP1, NUDT1, LIG1, EME1, GTF2H4, BRIP1, RAD54L, EEPD1, RAD51, NUPR1, TIMELESS, TDP1, POLD1, RUVBL2, RAD54B, CHAF1A |
| GO:0016568~chromatin modification                               | 2.090758 | KAT2A, HDAC2, NPTXR, PRMT7, PRMT5, EZH2, DNMT1, RUVBL2, MBD3, RUVBL1, RBM14, ASF1B, ASF1A                                                                                                    |
| GO:0006955~immune response                                      | -2.22662 | IL18R1, IL1R1, H2-Q5, HC, SLA2, TLR1, GBP9, CD1D1, FOXP3, H2-Q6, TLR6, TRAT1, CD1D2, H60B, CCR7, CBLB, H2-EB2, BNIP3L, GBP10, OAS1B, BCL6, H2-T24, GBP4, CD27                                |
| GO:0031327~negative regulation of cellular biosynthetic process | -2.22685 | SATB1, SLA2, HR, SMAD3, TTF1, MAF1, FOXP3, ZFP128, NRIP1, CITED2, EPC1, CIR1, RNF2, TIA1, TRPS1, TGIF1, ZFP281, PER1, BCL6, EIF2AK3, NR1H3                                                   |
| GO:0002684~positive regulation of immune system process         | -2.43481 | GM614, CBLB, HC, BCL6, CD1D1, H2-Q6, FOXP3, GM5511, TRAT1, CD27, CLEC2I, CD1D2                                                                                                               |
| GO:0009725~response to hormone stimulus                         | -2.48713 | IRS2, FOXO1, PDE3B, JAK2, LPIN1, PIK3R1, HMGB1-PS5, ACVR1C, NR1H3                                                                                                                            |
| GO:0051249~regulation of lymphocyte activation                  | -2.53318 | GM614, CBLB, BCL6, CD1D1, FOXP3, GM5511, CD27, CLEC2I, CD1D2                                                                                                                                 |
| GO:0045087~innate immune response                               | -2.55686 | IL18R1, IL1R1, HC, TLR1, TLR6, CD1D1, CD1D2                                                                                                                                                  |
| GO:0050865~regulation of cell activation                        | -2.63061 | GM614, CBLB, BCL6, RORA, CD1D1, FOXP3, GM5511, CD27, CLEC2I, CD1D2                                                                                                                           |
| GO:0002694~regulation of leukocyte activation                   | -2.66478 | GM614, CBLB, BCL6, RORA, CD1D1, FOXP3, GM5511, CD27, CLEC2I, CD1D2                                                                                                                           |

|                                                         |          |                                                                                                    |
|---------------------------------------------------------|----------|----------------------------------------------------------------------------------------------------|
| GO:0045321~leukocyte activation                         | -2.70669 | SATB1, SLA2, TLR1, JAG2, SMAD3, FOXP3, CD1D1, CD1D2, H60B, CBLB, CXCR4, BCL6, PIK3R1, CD27         |
| GO:0009719~response to endogenous stimulus              | -2.72593 | GNAL, IRS2, FOXO1, PDE3B, JAK2, LPIN1, PIK3R1, DDIT3, HMGB1-PS5, ACVR1C, NR1H3                     |
| GO:0044092~negative regulation of molecular function    | -2.76347 | ADRB2, SPRY1, S1PR1, CDKN1B, ZFYVE28, JAK2, FOXP3, DDIT3                                           |
| GO:0051094~positive regulation of developmental process | -2.76993 | GM614, FGFR1, EPC1, ADRB2, ETS1, PLXNB1, BTG1, TGIF1, CD1D1, FOXP3, GM5511, CD27, HMGB1-PS5, CD1D2 |
| GO:0046649~lymphocyte activation                        | -2.86475 | H60B, SATB1, CBLB, CXCR4, SLA2, JAG2, SMAD3, BCL6, CD1D1, FOXP3, PIK3R1, CD27, CD1D2               |
| GO:0045597~positive regulation of cell differentiation  | -2.86612 | GM614, EPC1, ETS1, PLXNB1, BTG1, TGIF1, CD1D1, FOXP3, GM5511, CD27, HMGB1-PS5, CD1D2               |
| GO:0001817~regulation of cytokine production            | -2.95234 | TIA1, TLR1, BCL6, TLR6, CD1D1, H2-Q6, FOXP3, CD27, CLEC2I, CD1D2                                   |
| GO:0042110~T cell activation                            | -3.14464 | SATB1, CBLB, CXCR4, SLA2, JAG2, SMAD3, CD1D1, FOXP3, CD1D2                                         |
| GO:0050863~regulation of T cell activation              | -3.37758 | GM614, CBLB, BCL6, CD1D1, FOXP3, GM5511, CD27, CLEC2I, CD1D2                                       |
| GO:0032318~regulation of Ras GTPase activity            | -3.4198  | SPRY1, S1PR1, ASAP1, BCL6, RICTOR, ARAP2                                                           |
| GO:0043087~regulation of GTPase activity                | -3.43206 | SPRY1, S1PR1, RASGRP3, ASAP1, BCL6, RICTOR, ARAP2                                                  |
| GO:0051098~regulation of binding                        | -3.54646 | ADRB2, SMAD3, JAK2, FOXP3, EIF2AK3, DDIT3, JMY                                                     |
| GO:0043434~response to peptide hormone stimulus         | -3.83977 | IRS2, FOXO1, PDE3B, JAK2, LPIN1, PIK3R1, ACVR1C, NR1H3                                             |
| GO:0045619~regulation of lymphocyte differentiation     | -4.71696 | GM614, BCL6, CD1D1, FOXP3, GM5511, CD27, CD1D2                                                     |
| GO:0030335~positive regulation of cell migration        | -4.92944 | IRS2, S1PR1, PIK3R1, HMGB1-PS5                                                                     |
| GO:0042035~regulation of cytokine biosynthetic process  | -4.98721 | TIA1, TLR1, TLR6, CD1D1, FOXP3, CD27, CLEC2I, CD1D2                                                |



|                                                                          |          |                                                  |
|--------------------------------------------------------------------------|----------|--------------------------------------------------|
| GO:0032868~response to insulin stimulus                                  | -5.40985 | IRS2, FOXO1, PDE3B, LPIN1, PIK3R1, ACVR1C, NR1H3 |
| GO:0032870~cellular response to hormone stimulus                         | -5.50312 | IRS2, FOXO1, PDE3B, JAK2, LPIN1, PIK3R1, NR1H3   |
| GO:0045580~regulation of T cell differentiation                          | -5.69966 | GM614, BCL6, CD1D1, FOXP3, GM5511, CD27, CD1D2   |
| GO:0032649~regulation of interferon-gamma production                     | -5.69966 | CD1D1, H2-Q6, FOXP3, CD27, CD1D2                 |
| GO:0051100~negative regulation of binding                                | -6.07964 | ADRB2, JAK2, FOXP3, DDIT3                        |
| GO:0032869~cellular response to insulin stimulus                         | -6.36242 | IRS2, FOXO1, PDE3B, LPIN1, PIK3R1, NR1H3         |
| GO:0008286~insulin receptor signaling pathway                            | -6.5139  | IRS2, FOXO1, PIK3R1, NR1H3                       |
| GO:0046634~regulation of alpha-beta T cell activation                    | -6.70549 | GM614, CBLB, BCL6, CD1D1, FOXP3, CD1D2           |
| GO:0045621~positive regulation of lymphocyte differentiation             | -6.70549 | GM614, CD1D1, FOXP3, GM5511, CD27, CD1D2         |
| GO:0045582~positive regulation of T cell differentiation                 | -7.12458 | GM614, CD1D1, FOXP3, GM5511, CD27, CD1D2         |
| GO:0046637~regulation of alpha-beta T cell differentiation               | -8.29042 | GM614, BCL6, CD1D1, FOXP3, CD1D2                 |
| GO:0045076~regulation of interleukin-2 biosynthetic process              | -9.77085 | CD1D1, FOXP3, CLEC2I, CD1D2                      |
| GO:0002711~positive regulation of T cell mediated immunity               | -10.5225 | CD1D1, H2-Q6, FOXP3, CD1D2                       |
| GO:0043370~regulation of CD4-positive, alpha beta T cell differentiation | -12.4356 | GM614, BCL6, FOXP3                               |
| GO:0045072~regulation of interferon-gamma biosynthetic process           | -12.4356 | CD1D1, FOXP3, CD27, CD1D2                        |
